# Supplementary material for: Controlled preparation of multiple mesoporous CoAl-LDHs nanosheets for the high performance of NOx detection at room temperature
Source: Royal Society of Chemistry journal article supplement (doi:10.1039/d0ra06250b), 2020-01-01
Supplement: d0ra06250b1.pdf [file d0ra06250b1.pdf]

## Supporting information

### *Controlled preparation of multiply mesoporous CoAl-LDHs nanosheet for high performance of NO<sub>x</sub> detection at room temperature*

*Di Wang<sup>a</sup>, Zhi Liu<sup>a</sup>, Ye Hong<sup>a</sup>, Chong Lin<sup>a</sup>, Qingjiang Pan<sup>a</sup>, Li Li<sup>\*a, b</sup> and Keying Shi<sup>\*a</sup>*

<sup>a</sup> Key Laboratory of Functional Inorganic Material Chemistry, Ministry of Education; Key Laboratory of Physical Chemistry, School of Chemistry and Material Science, Heilongjiang University, Harbin, 150080, P. R. China.

<sup>b</sup> College of Advanced Agriculture and Ecological Environment Heilongjiang University, Harbin 150080, P. R. China.

**Corresponding Author** Fax: +86 451 8660 4920; Tel: +86 451 8660 9141

E-mail: [lili1993036@hlju.edu.cn](mailto:lili1993036@hlju.edu.cn), [shikeying2008@163.com](mailto:shikeying2008@163.com)

**Table S1.** Gas sensing properties of CA2-1 sample compared with the references based on LDHs materials.

| Gas sensors                                                          | Operation temperature (°C) | Gas (concentration)                                                         | Response ( $R_a/R_g$ )              | Response/recovery time        | Stability (day) | References |
|----------------------------------------------------------------------|----------------------------|-----------------------------------------------------------------------------|-------------------------------------|-------------------------------|-----------------|------------|
| ZnO/ZnFe <sub>2</sub> O <sub>4</sub> composites                      | Room temperature           | NO <sub>x</sub> (100 ppm)                                                   | 76%                                 | 1.3 s/--                      | 35              | 17         |
| PS@Co-LDH                                                            | 200°C                      | Dimethyl sulfide (125 ppm);<br>Ethanol (4.3 ppm)                            | 3;<br>2.48                          | --/--<br>--/--                | --<br>--        | 18         |
| PANI/ZnTi-LDHs                                                       | Room temperature           | NH <sub>3</sub> (50ppm)                                                     | 39.52                               | 3/110s                        | --              | 19         |
| Chlorine intercalated LDH                                            | Room temperature           | CO<br>CO <sub>2</sub><br>NO<br>NO <sub>2</sub><br>CH <sub>4</sub> (125 ppm) | 0.04<br>0.1<br>0.13<br>0.11<br>0.17 | --/--                         | --              | 20         |
| NZAO                                                                 | Room temperature           | NO <sub>x</sub> (100 ppm)                                                   | 9.16                                | 6/26 s                        | 350             | 21         |
| NCDH-20                                                              | Room temperature           | NO <sub>x</sub> (97 ppm-0.97ppm)                                            | 70%<br>6%                           | 0.6 s/--<br>10 s/--           | --              | 22         |
| hierarchical $\alpha$ -Ni(OH) <sub>2</sub> flower-like architectures | Room temperature           | NO <sub>x</sub> (97 ppm)                                                    | 32.5%                               | 13 s/--                       | 35              | 23         |
| MgAl-LDHs                                                            | Room temperature           | NO <sub>x</sub> (100 ppm)                                                   | 76%                                 | 1.3 s/--                      | 35              | 24         |
| CoAl-LDHs                                                            | Room temperature           | NO <sub>x</sub> (100 ppm-0.01ppm)                                           | 17.09<br>1.19                       | 4.27/38.9<br>3s<br>1.07/46.6s | 60              | Our work   |

**Table S2.** The response, response time and recovery time results of CoAl-LDHs sensors (Co : Al = 2 : 1, hydrothermal time was 6 h) under the different NO<sub>x</sub> concentrations at room temperature.

| Sample<br>NO <sub>x</sub><br>(ppm) | CA-60 |                    |                    | CA2-1 |                    |                    | CA-120 |                    |                    |
|------------------------------------|-------|--------------------|--------------------|-------|--------------------|--------------------|--------|--------------------|--------------------|
|                                    | Res.  | T <sub>R1</sub> /s | T <sub>R2</sub> /s | Res.  | T <sub>R1</sub> /s | T <sub>R2</sub> /s | Res.   | T <sub>R1</sub> /s | T <sub>R2</sub> /s |
| 100                                | 3.54  | 7.63               | 41.32              | 17.09 | 4.27               | 38.93              | 2.78   | 4.53               | 58.76              |
| 50                                 | 3.27  | 5.26               | 42.04              | 14.53 | 5.33               | 39.07              | 2.56   | 5.27               | 62.57              |
| 30                                 | 3.15  | 7.38               | 41.37              | 10.98 | 5.33               | 34.13              | 2.07   | 8.23               | 65.32              |
| 10                                 | 1.67  | 2.96               | 36.07              | 5.17  | 5.87               | 38.93              | 1.83   | 4.32               | 69.31              |
| 5                                  | 1.52  | 2.34               | 38.75              | 4.36  | 7.47               | 35.20              | 1.69   | 4.15               | 54.02              |
| 3                                  | 1.38  | 1.98               | 31.85              | 3.17  | 7.47               | 47.20              | 1.54   | 5.87               | 53.18              |
| 1                                  | 1.17  | 1.65               | 42.38              | 2.66  | 11.20              | 31.47              | 1.36   | 5.96               | 61.08              |
| 0.5                                |       |                    |                    | 2.29  | 16.33              | 49.80              | 1.30   | 5.69               | 59.03              |
| 0.3                                |       |                    |                    | 2.04  | 17.07              | 46.40              | 1.21   | 4.20               | 60.68              |
| 0.1                                |       |                    |                    | 1.89  | 6.93               | 53.27              | 1.15   | 4.76               | 58.37              |
| 0.05                               |       |                    |                    | 1.60  | 9.60               | 49.07              |        |                    |                    |
| 0.03                               |       |                    |                    | 1.34  | 5.33               | 51.53              |        |                    |                    |
| 0.01                               |       |                    |                    | 1.19  | 1.07               | 46.40              |        |                    |                    |

\*Res.: Response T<sub>R1</sub> : Response time T<sub>R2</sub> : Recovery time

CA-60 : Hydrothermally heated at 60°C for 6 h

CA2-1 : Hydrothermally heated at 90°C for 6 h

CA-120 : Hydrothermally heated at 120°C for 6 h

**Table S3.** The response, response time and recovery time results of CoAl-LDHs sensors (Co : Al = 2 : 1, hydrothermal temperature was 90°C) under the different NO<sub>x</sub> concentrations at room temperature.

| Sample<br>NO <sub>x</sub><br>(ppm) | CA-3 |                    |                    | CA2-1 |                    |                    | CA-9 |                    |                    |
|------------------------------------|------|--------------------|--------------------|-------|--------------------|--------------------|------|--------------------|--------------------|
|                                    | Res. | T <sub>R1</sub> /s | T <sub>R2</sub> /s | Res.  | T <sub>R1</sub> /s | T <sub>R2</sub> /s | Res. | T <sub>R1</sub> /s | T <sub>R2</sub> /s |
| 100                                | 1.64 | 4.79               | 38.42              | 17.09 | 4.27               | 38.93              | 5.68 | 6.89               | 48.75              |
| 50                                 | 1.57 | 4.62               | 37.05              | 14.53 | 5.33               | 39.07              | 5.37 | 6.37               | 52.57              |
| 30                                 | 1.35 | 5.38               | 32.77              | 10.98 | 5.33               | 34.13              | 3.89 | 8.51               | 63.24              |
| 10                                 | 1.27 | 5.07               | 31.20              | 5.17  | 5.87               | 38.93              | 2.07 | 7.85               | 60.18              |
| 5                                  | 1.24 | 5.36               | 42.85              | 4.36  | 7.47               | 35.20              | 1.93 | 6.14               | 56.03              |
| 3                                  | 1.19 | 4.01               | 41.85              | 3.17  | 7.47               | 47.20              | 1.74 | 7.58               | 59.17              |
| 1                                  | 1.13 | 4.28               | 31.59              | 2.66  | 11.20              | 31.47              | 1.12 | 6.82               | 4.09               |
| 0.5                                |      |                    |                    | 2.29  | 16.33              | 49.80              |      |                    |                    |
| 0.3                                |      |                    |                    | 2.04  | 17.07              | 46.40              |      |                    |                    |
| 0.1                                |      |                    |                    | 1.89  | 6.93               | 53.27              |      |                    |                    |
| 0.05                               |      |                    |                    | 1.60  | 9.60               | 49.07              |      |                    |                    |
| 0.03                               |      |                    |                    | 1.34  | 5.33               | 51.53              |      |                    |                    |
| 0.01                               |      |                    |                    | 1.19  | 1.07               | 46.40              |      |                    |                    |

\*Res.: Response T<sub>R1</sub> : Response time T<sub>R2</sub> : Recovery time

CA-3 : Hydrothermally heated at 90°C for 3 h

CA2-1 : Hydrothermally heated at 90°C for 6 h

CA-9 : Hydrothermally heated at 90°C for 9 h

*(Revised Supporting information, table S2 and S3, page S3-S4)*

**Table S4.** The response, response time and recovery time results of CoAl-LDHs sensors (different mole ratio, hydrothermally heated at 90 °C for 6 h) under the different NO<sub>x</sub> concentrations at room temperature.

| Sample<br>NO <sub>x</sub><br>(ppm) | CA3-1 |                    |                    | CA2-1 |                    |                    | CA1-1 |                    |                    |
|------------------------------------|-------|--------------------|--------------------|-------|--------------------|--------------------|-------|--------------------|--------------------|
|                                    | Res.  | T <sub>R1</sub> /s | T <sub>R2</sub> /s | Res.  | T <sub>R1</sub> /s | T <sub>R2</sub> /s | Res.  | T <sub>R1</sub> /s | T <sub>R2</sub> /s |
| 100                                | 4.29  | 7.46               | 66.25              | 17.09 | 4.27               | 38.93              | 7.12  | 6.98               | 59.51              |
| 50                                 | 4.14  | 8.26               | 57.62              | 14.53 | 5.33               | 39.07              | 6.73  | 7.73               | 60.75              |
| 30                                 | 3.60  | 8.53               | 62.73              | 10.98 | 5.33               | 34.13              | 6.29  | 8.35               | 62.41              |
| 10                                 | 2.07  | 7.50               | 61.20              | 5.17  | 5.87               | 38.93              | 2.78  | 7.82               | 57.32              |
| 5                                  | 1.96  | 8.63               | 62.58              | 4.36  | 7.47               | 35.20              | 2.39  | 6.49               | 58.20              |
| 3                                  | 1.72  | 8.40               | 71.18              | 3.17  | 7.47               | 47.20              | 2.17  | 6.87               | 63.70              |
| 1                                  | 1.62  | 7.82               | 67.95              | 2.66  | 11.20              | 31.47              | 1.78  | 6.95               | 61.07              |
| 0.5                                | 1.54  | 7.31               | 68.95              | 2.29  | 16.33              | 49.80              | 1.58  | 8.40               | 57.98              |
| 0.3                                | 1.37  | 7.84               | 63.20              | 2.04  | 17.07              | 46.40              | 1.47  | 8.17               | 56.31              |
| 0.1                                | 1.12  | 7.28               | 67.71              | 1.89  | 6.93               | 53.27              | 1.19  | 7.62               | 56.54              |
| 0.05                               |       |                    |                    | 1.60  | 9.60               | 49.07              |       |                    |                    |
| 0.03                               |       |                    |                    | 1.34  | 5.33               | 51.53              |       |                    |                    |
| 0.01                               |       |                    |                    | 1.19  | 1.07               | 46.40              |       |                    |                    |

\*Res.: Response    T<sub>R1</sub> : Response time    T<sub>R2</sub> : Recovery time

CA3-1 : The molar ratio of Co : Al = 3 : 1

CA2-1 : The molar ratio of Co : Al = 2 : 1

CA1-1 : The molar ratio of Co : Al = 1 : 1

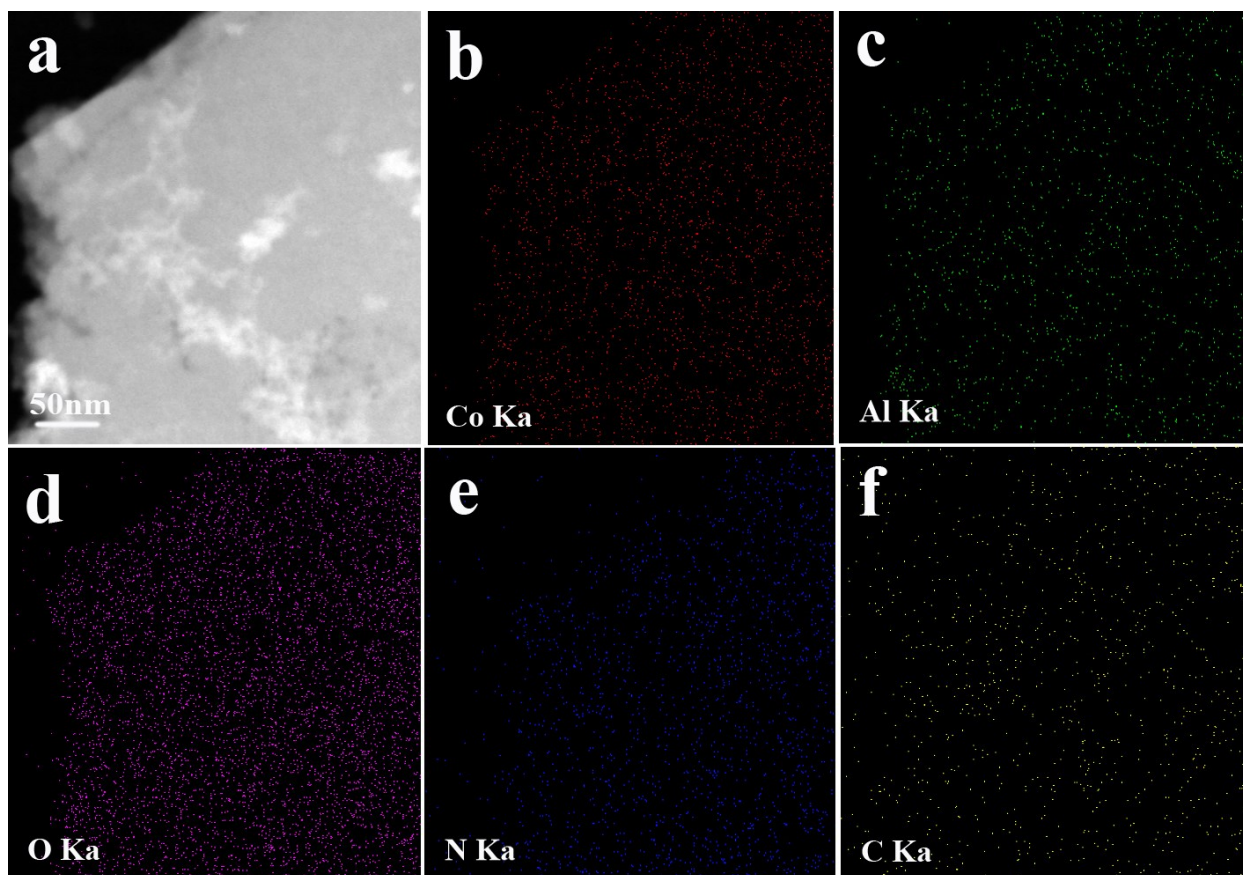

Fig. S1. Mapping of CA2-1 sample.

Fig. S1. showed that the Mapping of CA2-1 sample was composed of two-dimensional nanosheets. It could be seen from the bright image of Fig. S1.(b-f) that elements Co, Al and O were evenly distributed.

**Table S5.** O1s results of samples

| Sample | Peak position (eV) | Peak area % |
|--------|--------------------|-------------|
| CA1-1  | 534.4              | 47.37       |
|        | 530.8              | 52.63       |
| CA2-1  | 534.5              | 57.09       |
|        | 530.7              | 42.91       |
| CA3-1  | 533.5              | 52.41       |
|        | 530.8              | 47.59       |

## ***Related References***

- 17 S. R. Liu, M. Y. Guan and X. Z. Li, Light irradiation enhanced triethylamine gas sensing materials based on ZnO/ZnFe<sub>2</sub>O<sub>4</sub> composites, *Sensors and Actuators B: Chemical*, 2016, **236**, 350-357.
- 18 Y. Y. Li, F. Zhou, L. Gao, G. T. Duan, Co<sub>3</sub>O<sub>4</sub> nanosheet-built hollow spheres containing ultrafine neck-connected grains templated by PS@Co-LDH and their ppb-level gas-sensing performance, *Sensors and Actuators B*, 2018, **261**, 553-565.
- 19 Y. X. Qin, L. P. Wang and X. F. Wang, A high performance sensor based on PANI/ZnTi-LDHs nanocomposite for trace NH<sub>3</sub> detection, *Organic Electronics*, 2019, **66**, 102-109.
- 20 D. Polese, A. Mattoccia, F. Giorgi, L. Pazzini, L. D. Giamberardino, G. Fortunato and P.G. Medaglia, A phenomenological investigation on Chlorine intercalated Layered Double Hydroxides used as room temperature gas sensors, *Journal of Alloys and Compounds*, 2017, **692**, 915-922.
- 21 X. Y. Zhang, L. Teng, Y. Liu, Z. Liu, J. L. Xue, M. Ikram, M. ullah, L. Li and K. Y. Shi, 3D flower-like NiZnAl multimetal oxide constructed by ultra-thin porous nanosheets: A long-term and stable sensing material for NO<sub>x</sub> at room temperature, *Sensors and Actuators: B. Chemical*, 2019, **300**, 126-899.
- 22 Y. L. Ge, K. Kan, Y. Yang, L. Zhou, L. Q. Jing, P. K. Shen, L. Li and K. Y. Shi, Highly mesoporous hierarchical nickel and cobalt double hydroxide composite: fabrication, characterization and ultrafast NO<sub>x</sub> gas sensors at room temperature, *J. Mater. Chem. A*, 2014, **2**, 4961.
- 23 H. Wang, J. Gao, Z. Li, Y. Ge, K. Kan and K. Y. Shi, One-step synthesis of hierarchical α-Ni(OH)<sub>2</sub> flowerlike architectures and their gas sensing properties for NO<sub>x</sub> at room temperature, *CrystEngComm*, 2012, **14**, 6843-6852.
- 24 H. X. Sun, Z. Y. Chu, D. H. Hong, G. Zhang, Y. Xie, L. Li and K. Y. Shi, Three-dimensional hierarchical flower-like MgAl-layered double hydroxides:

Fabrication, characterization and enhanced sensing properties to NO<sub>x</sub> at room temperature, *Journal of Alloys and Compounds*, 2016, **658**, 561-568.
